# Supplementary material for: Ce1−xSrxO2−δ solid solution supports cobalt-based catalysts for hydrogen production via auto-thermal reforming of acetic acid
Source: Royal Society of Chemistry journal article supplement (doi:10.1039/d2cy01624a), 2022-01-01
Supplement: d2cy01624a1.pdf [file d2cy01624a1.pdf]

## **Ce<sub>1-x</sub>Sr<sub>x</sub>O<sub>2-δ</sub> solid solution support cobalt-based catalysts for hydrogen production via auto-thermal reforming of acetic acid**

Chenghong Shu<sup>a,d,#</sup>, Chenyu Ding<sup>a,#</sup>, Yan Liu<sup>a</sup>, Wenjing Sun<sup>c</sup>, Jia Huang<sup>a</sup>, Fuxia Liao<sup>a</sup>, Lihong Huang<sup>a,d,\*</sup>, Ning Wang<sup>b,\*</sup>

<sup>a</sup> Department of Chemical and Pharmaceutical Engineering, Chengdu University of Technology, Chengdu 610059, China

<sup>b</sup> Faculty of Environment and Life, Beijing University of Technology, Beijing 100124, China

<sup>c</sup> China-America Cancer Research Institute, Key Laboratory for Medical Molecular Diagnostics of Guangdong Province, Guangdong Medical University, Dongguan, Guangdong 523808, China

<sup>d</sup> State Key Laboratory of Geohazard Prevention and Geoenvironment Protection, Chengdu University of Technology, Chengdu 610059, China

# These authors contributed equally to this work.

\* Corresponding author at: Department of Chemical Engineering, Chengdu University of Technology, Chengdu 610059, China

E-mail address: [ning.wang.1@bjut.edu.cn](mailto:ning.wang.1@bjut.edu.cn) (N. Wang), [huanglihong06@cdut.cn](mailto:huanglihong06@cdut.cn) (L. Huang)

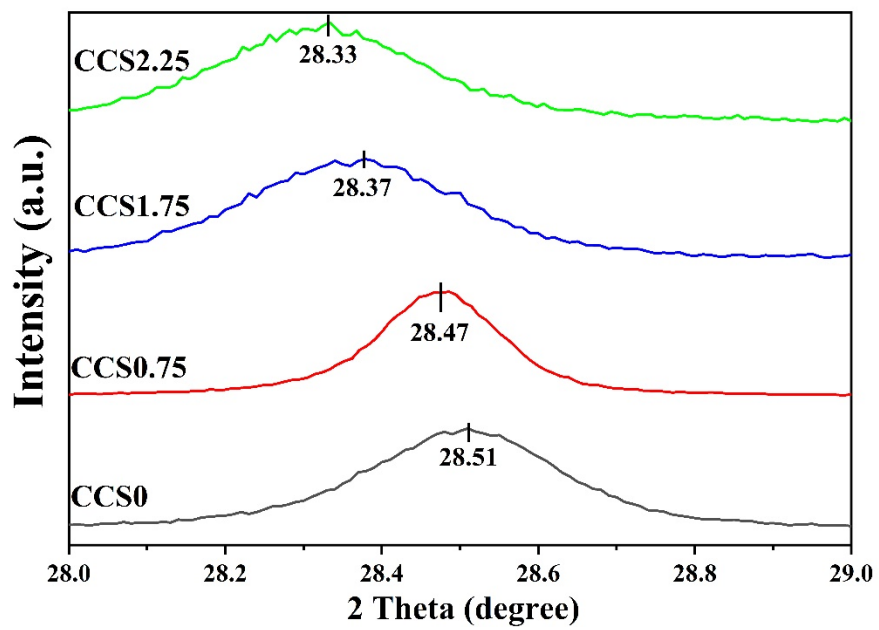

Fig. S1. Enlarged XRD patterns from 28° to 29°

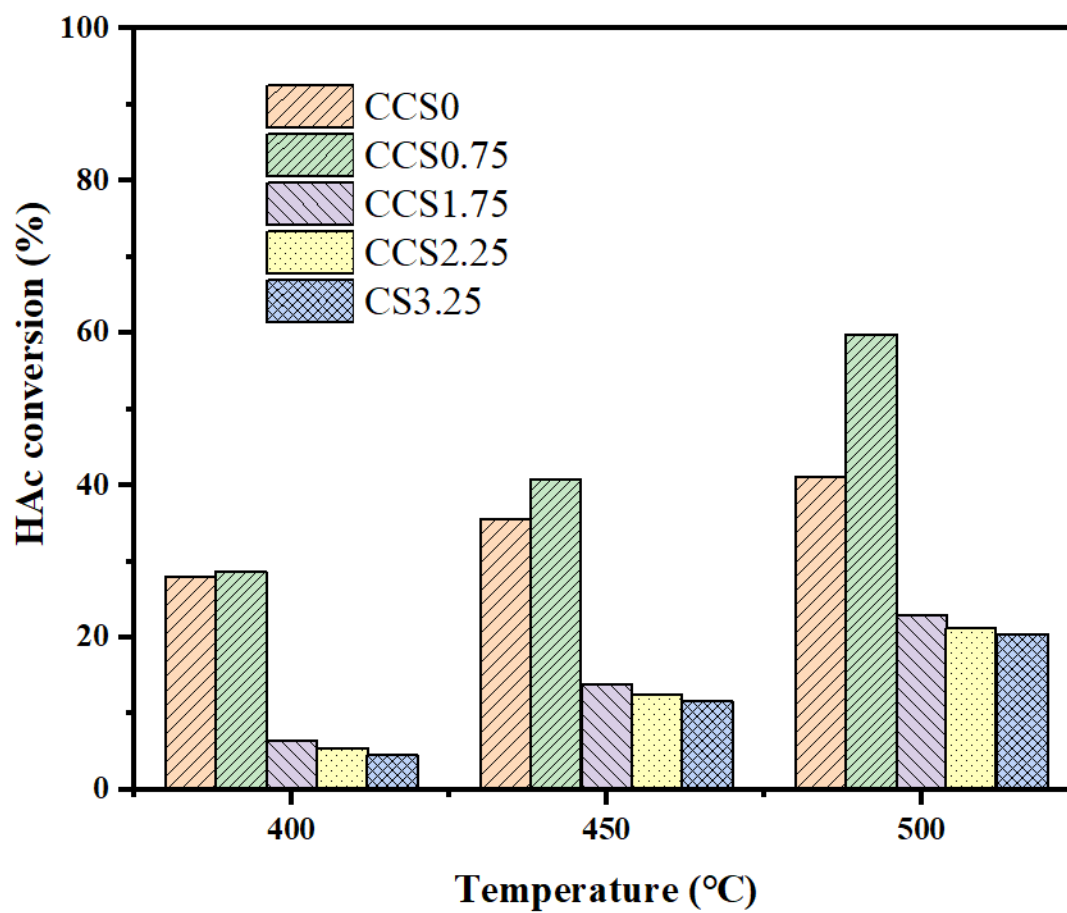

**Fig. S2.** Effect of temperature on the HAc conversion of the  $\text{CCS}_x$  catalysts at  $\text{GHSV} = 50000 \text{ mL} \cdot \text{g}_{\text{catal}}^{-1} \cdot \text{h}^{-1}$  in ATR

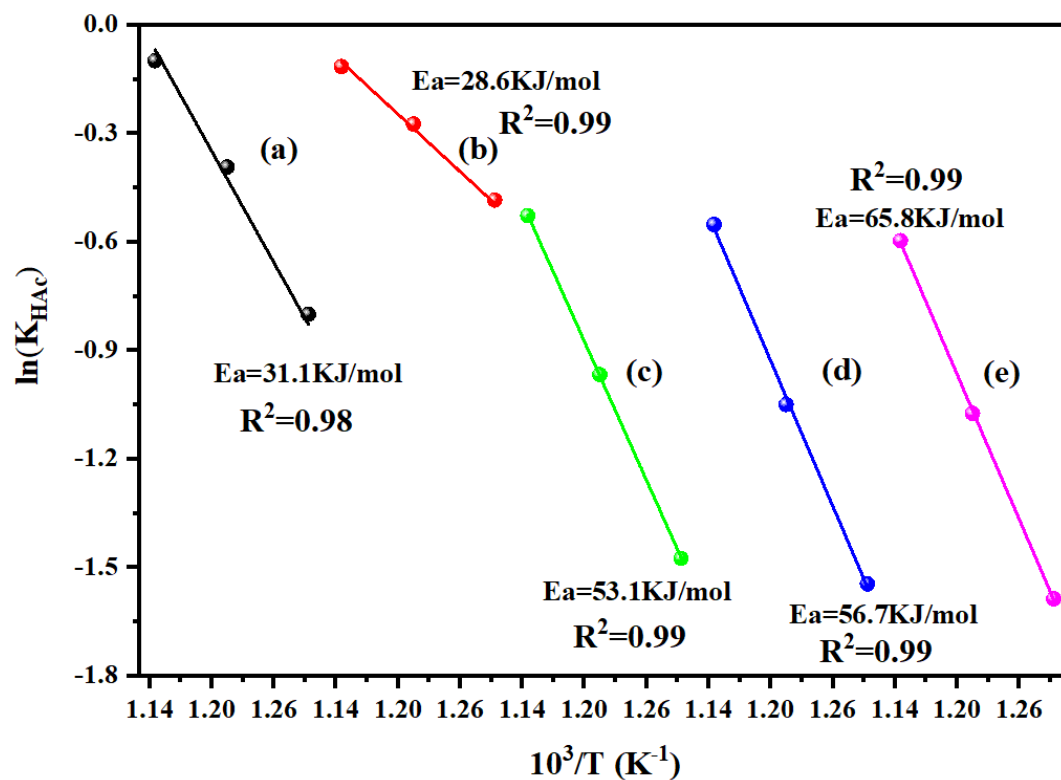

**Fig. S3.** Arrhenius plots of CCS<sub>x</sub> catalyst: (a) CCS0, (b) CCS0.75, (c) CCS1.75, (d) CCS2.25 (e) CS3.25

**Table S1.** Cell parameters of CCS<sub>x</sub> catalysts.

| Catalysts | Main Phase composition                             | Space group | Cell parameters (Å) |       |       |
|-----------|----------------------------------------------------|-------------|---------------------|-------|-------|
|           |                                                    |             | a                   | b     | c     |
| CCS0      | CeO <sub>2</sub>                                   | Fm-3m       | 5.411               | 5.411 | 5.411 |
| CCS0.75   | Ce <sub>1-x</sub> Sr <sub>x</sub> O <sub>2-δ</sub> | Fm-3m       | 5.423               | 5.423 | 5.423 |
| CCS1.75   | Ce <sub>1-x</sub> Sr <sub>x</sub> O <sub>2-δ</sub> | Fm-3m       | 5.430               | 5.430 | 5.430 |
| CCS2.25   | Ce <sub>1-x</sub> Sr <sub>x</sub> O <sub>2-δ</sub> | Fm-3m       | 5.425               | 5.425 | 5.425 |
| CS3.25    | SrCO <sub>3</sub>                                  | Pm-cn       | 5.107               | 8.421 | 6.028 |

**Table S2.** Hydrogen uptake and Co<sup>0</sup> reducibility from H<sub>2</sub>-TPR

| Catalysts | Hydrogen consumption (mmol/g) |        | Co <sup>0</sup>  |
|-----------|-------------------------------|--------|------------------|
|           |                               |        | Reducibility (%) |
|           | Peak 1                        | Peak 2 |                  |
| CCS0      | 0.93                          | 1.39   | 10.5             |
| CCS0.75   | 1.03                          | 2.01   | 15.4             |
| CCS1.75   | 0.45                          | 0.77   | 8.5              |
| CCS2.25   | 0.37                          | 0.35   | 7.2              |
| CS3.25    | 0.11                          | 0.23   | 4.3              |

**Table S3.** The Co<sup>0</sup> dispersion, hydrogen production rate, TOF-H<sub>2</sub> and E<sub>a</sub> of CCS<sub>x</sub> catalysts

| Catalysts | Co <sup>0</sup> dispersion <sup>a</sup> | Hydrogen production rate (μmol-<br>H <sub>2</sub> ·s <sup>-1</sup> ·gcat <sup>-1</sup> ) <sup>b</sup> | TOF of H <sub>2</sub><br>(10 <sup>-2</sup> s <sup>-1</sup> ) <sup>c</sup> | Activation energy (E <sub>a</sub> )<br>kJ*mol <sup>-1</sup> |
|-----------|-----------------------------------------|-------------------------------------------------------------------------------------------------------|---------------------------------------------------------------------------|-------------------------------------------------------------|
| CCS0      | 0.066                                   | 7.57                                                                                                  | 12.8                                                                      | 31.1                                                        |
| CCS0.75   | 0.074                                   | 9.77                                                                                                  | 14.8                                                                      | 28.6                                                        |
| CCS1.75   | 0.046                                   | 0.58                                                                                                  | 1.5                                                                       | 53.1                                                        |
| CCS2.25   | 0.027                                   | 0.33                                                                                                  | 1.4                                                                       | 56.7                                                        |
| CS3.25    | 0.015                                   | 0.06                                                                                                  | 0.5                                                                       | 65.8                                                        |

<sup>a</sup> Obtained from H<sub>2</sub>-TPD by assuming H<sub>ad</sub>/Co<sup>0</sup><sub>surf</sub>=1

<sup>b</sup> Obtained from Eq. (14)

<sup>c</sup> Obtained from Eq. (15)

**Table S4.** The distances between Ce/Sr atom and its nearest O atoms.

|      | Ce-O1 | Ce-O2 | Ce-O3 | Ce-O4 | Ce-O5 | Ce-O6 |
|------|-------|-------|-------|-------|-------|-------|
| d(Å) | 2.35  | 2.37  | 2.37  | 2.37  | 2.37  | 2.37  |
|      | Sr-O1 | Sr-O2 | Sr-O3 | Sr-O4 | Sr-O5 | Sr-O6 |
| d(Å) | 2.59  | 2.57  | 2.60  | 2.58  | 2.60  | 2.57  |



**Table S5.** The calculated  $E_{\text{vac}}$  (in eV) for the  $\text{Ce}_{1-x}\text{Sr}_x\text{O}_{2-\delta}$  (111) surface with one and two O vacancies. For the  $\text{CeO}_2(111)$  surface, the surface and subsurface O vacancy formation energies were 2.58 and 2.50 eV, respectively.  $V_{\text{OI}}-V_{\text{OIII}}$  were the surface vacancies and  $V_{\text{OIV}}-V_{\text{OV}}$  were the subsurface vacancies for the  $\text{Ce}_{1-x}\text{Sr}_x\text{O}_{2-\delta}$  (111) surface;  $V_{\text{OIV-1}}-V_{\text{OIV-2}}$  were the surface vacancies and  $V_{\text{OIV-3}}-V_{\text{OIV-4}}$  were the subsurface vacancies.

| $\text{Ce}_{1-x}\text{Sr}_x\text{O}_{2-\delta}^{\text{a}}$<br>( $\text{Ce}_{47}\text{Sr}_1\text{O}_{95}$ ) | $V_{\text{OI}}$    | $V_{\text{OII}}$   | $V_{\text{OIII=OV}}$ | $V_{\text{OIV}}$   | $V_{\text{OVI}}$ |
|------------------------------------------------------------------------------------------------------------|--------------------|--------------------|----------------------|--------------------|------------------|
| $E_{\text{vac}}$ (eV)                                                                                      | -0.705             | -0.704             | -0.776               | -0.804             | -0.778           |
| $\text{Ce}_{1-x}\text{Sr}_x\text{O}_{2-\delta}^{\text{b}}$<br>( $\text{Ce}_{47}\text{Sr}_1\text{O}_{94}$ ) | $V_{\text{OIV-1}}$ | $V_{\text{OIV-2}}$ | $V_{\text{OIV-3}}$   | $V_{\text{OIV-4}}$ |                  |
| $E_{\text{vac}}$ (eV)                                                                                      | 1.22               | 0.92               | 1.05                 | 1.96               |                  |

<sup>a</sup> The unique structure of Sr-CeO<sub>2</sub> with one O vacancy

<sup>b</sup> The unique structure of Sr-CeO<sub>2</sub> with two O vacancy (based on O<sub>IV</sub> structure by removing of the second structurally unique oxygen atoms)
